# Supplementary material
Source: HighWire-hosted journal article supplement (doi:10.1101/rna.079620.123)
Supplement: Supplemental_Table_S1.xlsx [file Supplemental_Table_S1.xlsx]

## Sheet: Table S1
tRNA MODIFICATION or FUNCTION	S. cerevisiae gene(s)	Known or plausible Human Gene(s)a
RNase P	POP1, POP3, POP4, POP5, POP6, POP7, POP8, RPP1, RPR2, RPR1 (RNA)	POP1, RPP29 (Sc. POP4), POP5, RPP30 (Sc. RPP1), RPP21 (Sc. RPR2), RPP14, RPP20, RPP25, RPP38, RPP40, H1 (RNA)
3' endonuclease	TRZ1	ELAC2
La	LHP1	SSB (La)
3'- 5' exonuclease	REX1	REXO1L1P
CCA adding enzyme	CCA1	TRNT1
G-1	THG1	THG1L
Am4, Gm4, Cm4	TRM13	TRMT13
m1G9	TRM10	TRMT10A
m1A9		TRMT10B
m2G10	TRM11, TRM112	TRMT11,TRMT112
ac4C12	TAN1	THUMPD1
Ψ13, Ψ35	PUS7	PUS7
D16, D17	DUS1	DUS1L
Gm18	TRM3	TARBP1
D20	DUS2	DUS2L
D20a, D20b	DUS4	DUS4L
m2,2G26	TRM1	TRMT1
Ψ26, Ψ27, Ψ28, Ψ34, Ψ36, Ψ65, Ψ67	PUS1	PUS1
Ψ31	PUS6	RPUSD2
Ψ32	PUS8	RPUSD2
m3C32	TRM140 and SES1	METTL2 and DALRD3, METTL6 and SARS1
Cm32	TRM7, TRM732	FTSJ1, THADA
Cm34, Gm34, ncm5Um34	TRM7, TRM734	FTSJ1, WDR6
mcm5U34, mcm5s2U34, ncm5U34, ncm5Um34	ELP1, ELP2, ELP3, ELP4, ELP5, ELP6, KTI11 (DPH3), KTI12, KTI13 (ATS1), KTI14 (HRR25), SAP185, SAP190, SIT4	IKBKAP (ELP1), ELP2, ELP3, ELP4, ELP5, ELP6, DPH3, KTI12, SERGEF, CSNK1A1, PPP6R, PPP6R, PPP6C
mcm5s2U34	NFS1, TUM1, UBA4, URM1, NCS2, NCS6, CFD1, CIA1, ISU1, ISU2, NBP35	NFS1, MPST, MOCS3, URM1, CTU2, CTU1, NUBP2, CIAO1, ISCU, ISCU, NUBP1
mcm5U34 and mcm5s2U34	TRM9, TRM112	ALKBH8,TRMT112
I34	TAD2, TAD3	ADAT2, ADAT3
Q34		QTRT1 (TGT)
m5C34, m5C40, m5C48, m5C49	TRM4 (NCL1)	NSUN2
i6A37	MOD5	TRIT1
I37	TAD1	ADAT1
m1G37, m1I37	TRM5	TRMT5
yW37	TYW1,TYW2, TYW3, TYW4	TYW1, TYW2 (TRMT12), TYW3,TYW4 (LCMT2)
t6A37	BUD32, KAE1, PCC1, GON7, CGI121c, SUA5	TP53RK, OSGEP, LAGE3, GON7, TPRKB, YRDC
ct6A37	TCD1, TCD2
m5C38		DNMT2
Ψ38, Ψ39	PUS3	PUS3
Um44	TRM44	TRMT44
m7G46	TRM8, TRM82	METTL1, WDR4
D47	DUS3	DU3L
m5U54	TRM2	TRMT44
Ψ55	PUS4	TRUB1
m1A58	TRM6, TRM61	TRMT6, TRMT61A
Ar(p)64	RIT1	none
tRNA splicing endonuclease	SEN2, SEN15, SEN34, SEN54	TSEN2, TSEN15, TSEN34, TSEN54
tRNA splicing, ligase	TRL1 (RLG1)
tRNA splicing, ligase		RTCB
tRNA splicing (ligation)		ARCH
tRNA splicing (ligation)		DDX1
tRNA splicing, 2’-phosphotransferase	TPT1	TRPT1b
5'-3' exonuclease, rapid tRNA decay	XRN1	XRN1
5'-3' exonuclease, rapid tRNA decay	RAT1	XRN2
regulation of rapid tRNA decay	MET22	BPNT2
TRAMP complex	TRF4,TRF5, MTR4, AIR1 or AIR2	TENT4A, TENT4B,MTREX, ZCCHC7, ZCCHC7
nuclear exosome (catalytic 3' -5' exonuclease)	RRP6, RRP44 (DIS3)	EXOSC10, DIS3
tRNA trafficking	LOS1	XPOT (Exportin-t)
tRNA trafficking	MEX67-MTR2	NXF1-NXT1
tRNA trafficking	CRM1	XPO1 (Exportin-1)
tRNA trafficking	MSN5	XPO5 (Exportin-5)
tRNA trafficking	MTR10	Transportin 3b
tRNA trafficking	SSA2	NA
a: the genes in this column are orthologs as defined by experiment, or by the Saccharomyces genome data base https://www.yeastgenome.org/
b: these human genes do not have the same function as that known for the corresponding S. cerevisiae orthologs
c: the S. cerevisiae Cgi121 subunit of the KEOPS complex is reported not to be required for formation of t6A, but the orthologous human subunit TPRKB is implicated in GAMOS due to reduced t6A
